# Supplementary material for: Phenotyping pipeline reveals major seedling root growth QTL in hexaploid wheat
Source: PubMed Central journal article supplement (PMC4407652; doi:10.1093/jxb/erv006), 2015-03-04

# **Novel phenotyping pipeline reveals major seedling root growth QTL in hexaploid wheat**

Jonathan A. Atkinson, Luzie U. Wingen, Marcus Griffiths, Michael P Pound, Oorbessy Gaju, John Foulkes, Jacques Le Gouis, Simon Griffiths, Malcolm J. Bennett, Julie King, and Darren M. Wells

## **SUPPLEMENTARY MATERIAL**

**Supplementary Table 1.** Root system trait values

**Supplementary Table 2.** Correlation matrix for measured traits

**Supplementary Figure 1.** Frequency distribution of measured root traits

**Supplementary Figure 2.** Distribution of field traits

**Supplementary Table 1.** Mean root system traits (RIA = Rialto, SAV = Savannah)

| Trait                  | RIA   | SD   | Min   | Max    | SAV   | SD   | Min   | Max   | DH    | SD    | Min   | Max    |
|------------------------|-------|------|-------|--------|-------|------|-------|-------|-------|-------|-------|--------|
| TLA (mm)               | 354.1 | 98.8 | 197   | 676    | 664.2 | 162  | 362.2 | 995.6 | 483.5 | 181.2 | 118.0 | 1191.1 |
| TLL (mm)               | 16.4  | 20.5 | 0.0   | 92.3   | 105.0 | 78.9 | 1.2   | 323.4 | 32.6  | 43.4  | 0.0   | 340.9  |
| TLS (mm)               | 337.7 | 82.5 | 195.5 | 583.7  | 559.2 | 100  | 360.9 | 733.9 | 450.9 | 151.7 | 118.0 | 1033.8 |
| RAE1 (°)               | 101.7 | 21.5 | 56.2  | 141.78 | 100.8 | 19.5 | 60.1  | 142.3 | 93.6  | 29.9  | 5.0   | 203.7  |
| RAE2 (°)               | 63.6  | 23.7 | 32.0  | 106.11 | 76.5  | 15.8 | 48.3  | 101.7 | 63.5  | 23.1  | 8.3   | 143.0  |
| RLC                    | 5.3   | 4.9  | 0.0   | 18     | 23.9  | 14.7 | 1.0   | 56.0  | 9.4   | 10.5  | 0.0   | 62.0   |
| RSC                    | 5.2   | 0.4  | 5.0   | 6      | 4.8   | 0.5  | 4.0   | 6.0   | 4.7   | 0.7   | 2.0   | 7.0    |
| RCH (mm <sup>2</sup> ) | 3910  | 2444 | 1170  | 12350  | 17243 | 8283 | 5281  | 35350 | 9152  | 6823  | 402   | 39353  |
| RMW (mm)               | 71.6  | 23.7 | 21.5  | 122.9  | 136.8 | 47.5 | 50.8  | 212.5 | 89.2  | 43.0  | 5.7   | 239.1  |
| MD (mm)                | 110.8 | 22.1 | 80.0  | 185.5  | 226.3 | 46.9 | 130.1 | 298.1 | 166.3 | 54.1  | 49.7  | 310.3  |
| MWD                    | 0.7   | 0.2  | 0.2   | 0.95   | 0.6   | 0.2  | 0.2   | 1.0   | 0.6   | 0.2   | 0.0   | 1.5    |
| RCMX (mm)              | 0.2   | 3.4  | -5.8  | 7.8    | -0.5  | 5.8  | -10.6 | 8.2   | -1.9  | 6.4   | -37.3 | 30.4   |
| RCMY (mm)              | 28.9  | 6.7  | 17.5  | 48.3   | 58.5  | 10.2 | 36.7  | 78.2  | 50.6  | 17.5  | 11.5  | 100.9  |
| RCHCX (mm)             | 0.9   | 5.2  | -9.9  | 15.3   | -2.8  | 15.2 | -33.7 | 24.8  | -4.1  | 9.7   | -52.2 | 28.6   |
| RCHCY (mm)             | 44.0  | 12.5 | 26.9  | 85.3   | 100.7 | 20.2 | 57.8  | 136.5 | 76.9  | 28.9  | 15.8  | 159.2  |
| RAE951 (°)             | 94.1  | 19.7 | 48.3  | 117.08 | 96.0  | 16.6 | 67.4  | 131.6 | 88.2  | 22.2  | 0.4   | 185.5  |
| RAE952 (°)             | 53.9  | 22.5 | 26.0  | 97.27  | 71.3  | 19.7 | 46.4  | 118.6 | 59.0  | 21.6  | 5.8   | 128.7  |
| RAE251 (°)             | 92.9  | 19.9 | 44.6  | 115.99 | 90.3  | 9.3  | 66.6  | 102.9 | 84.4  | 20.8  | 6.6   | 161.1  |
| RAE252 (°)             | 55.8  | 19.1 | 28.9  | 92.75  | 64.0  | 12.7 | 46.4  | 85.5  | 56.4  | 20.2  | 2.8   | 115.6  |
| RAE502 (°)             | 85.4  | 23.3 | 25.2  | 114.24 | 91.0  | 10.8 | 65.7  | 104.4 | 79.6  | 20.8  | 5.1   | 140.6  |
| RAE502 (°)             | 55.3  | 17.9 | 23.4  | 82.42  | 55.3  | 17.7 | 24.9  | 80.3  | 50.6  | 19.5  | 0.5   | 102.8  |
| RAE751 (°)             | 81.6  | 22.0 | 26.1  | 110.28 | 90.8  | 15.7 | 59.3  | 116.4 | 76.9  | 21.3  | 2.4   | 168.1  |
| RAE752 (°)             | 48.7  | 20.1 | 4.9   | 74.12  | 53.4  | 17.1 | 24.5  | 74.9  | 47.3  | 18.7  | 1.6   | 101.1  |
| RAE1001 (°)            | 77.1  | 21.6 | 27.4  | 110.09 | 90.5  | 18.6 | 57.2  | 123.9 | 74.7  | 22.3  | 4.9   | 185.5  |
| RAE1002 (°)            | 41.4  | 19.0 | 1.9   | 69.14  | 52.9  | 13.8 | 30.5  | 71.5  | 43.9  | 17.8  | 3.3   | 96.7   |

**Supplementary Table 2. Correlation matrix for all measured traits**

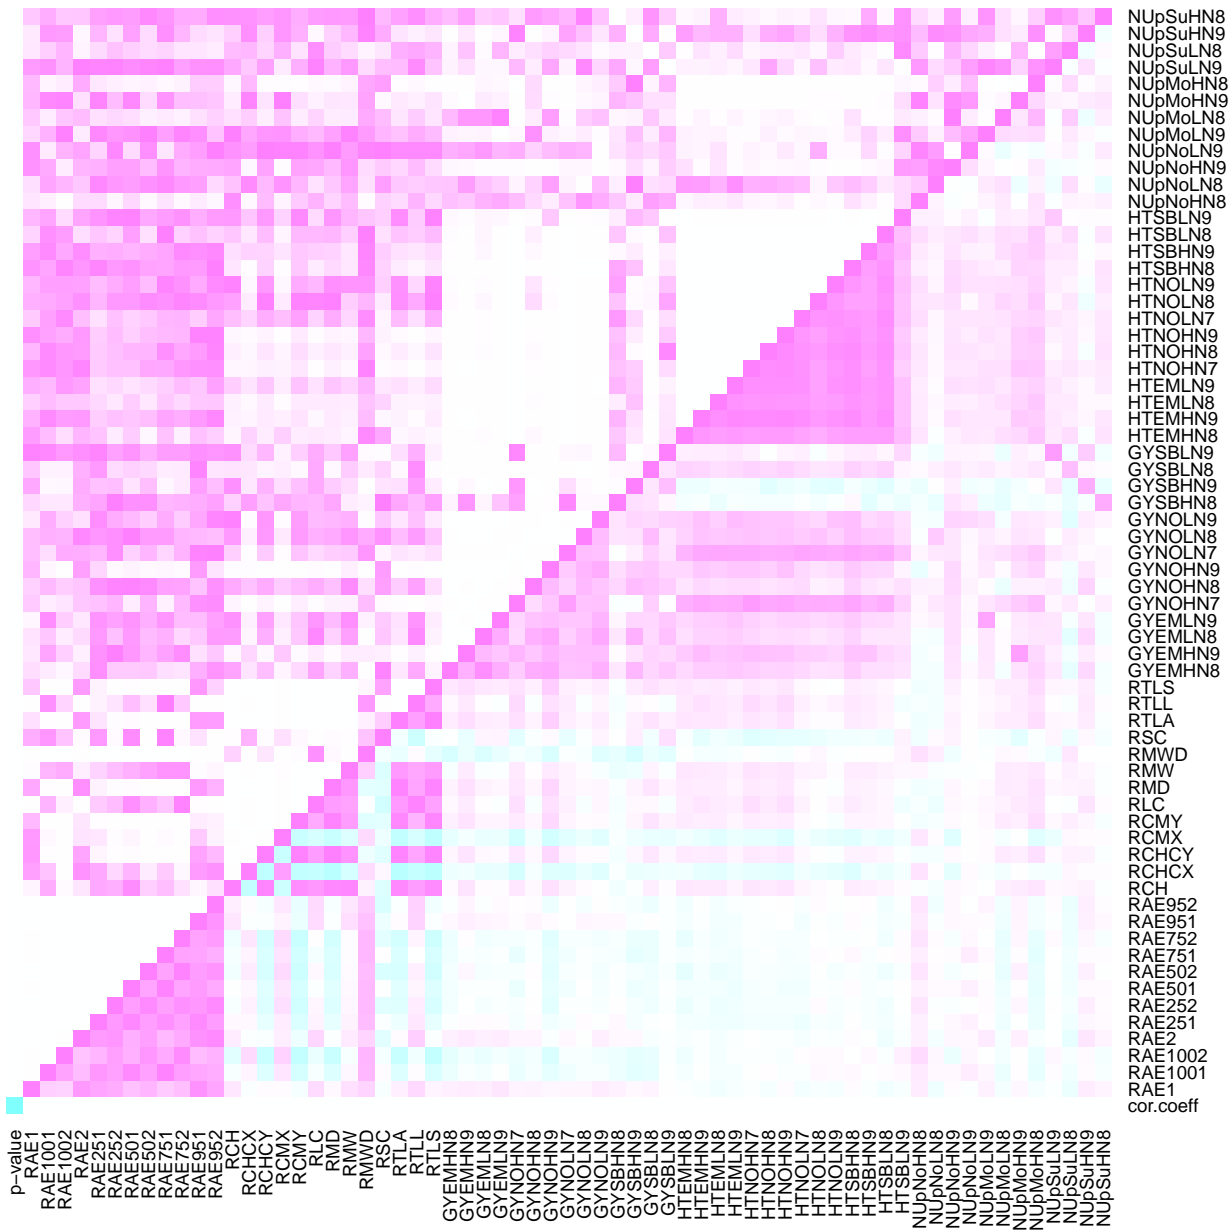

**Supplementary Figure 1. Frequency distributions of measured root traits**

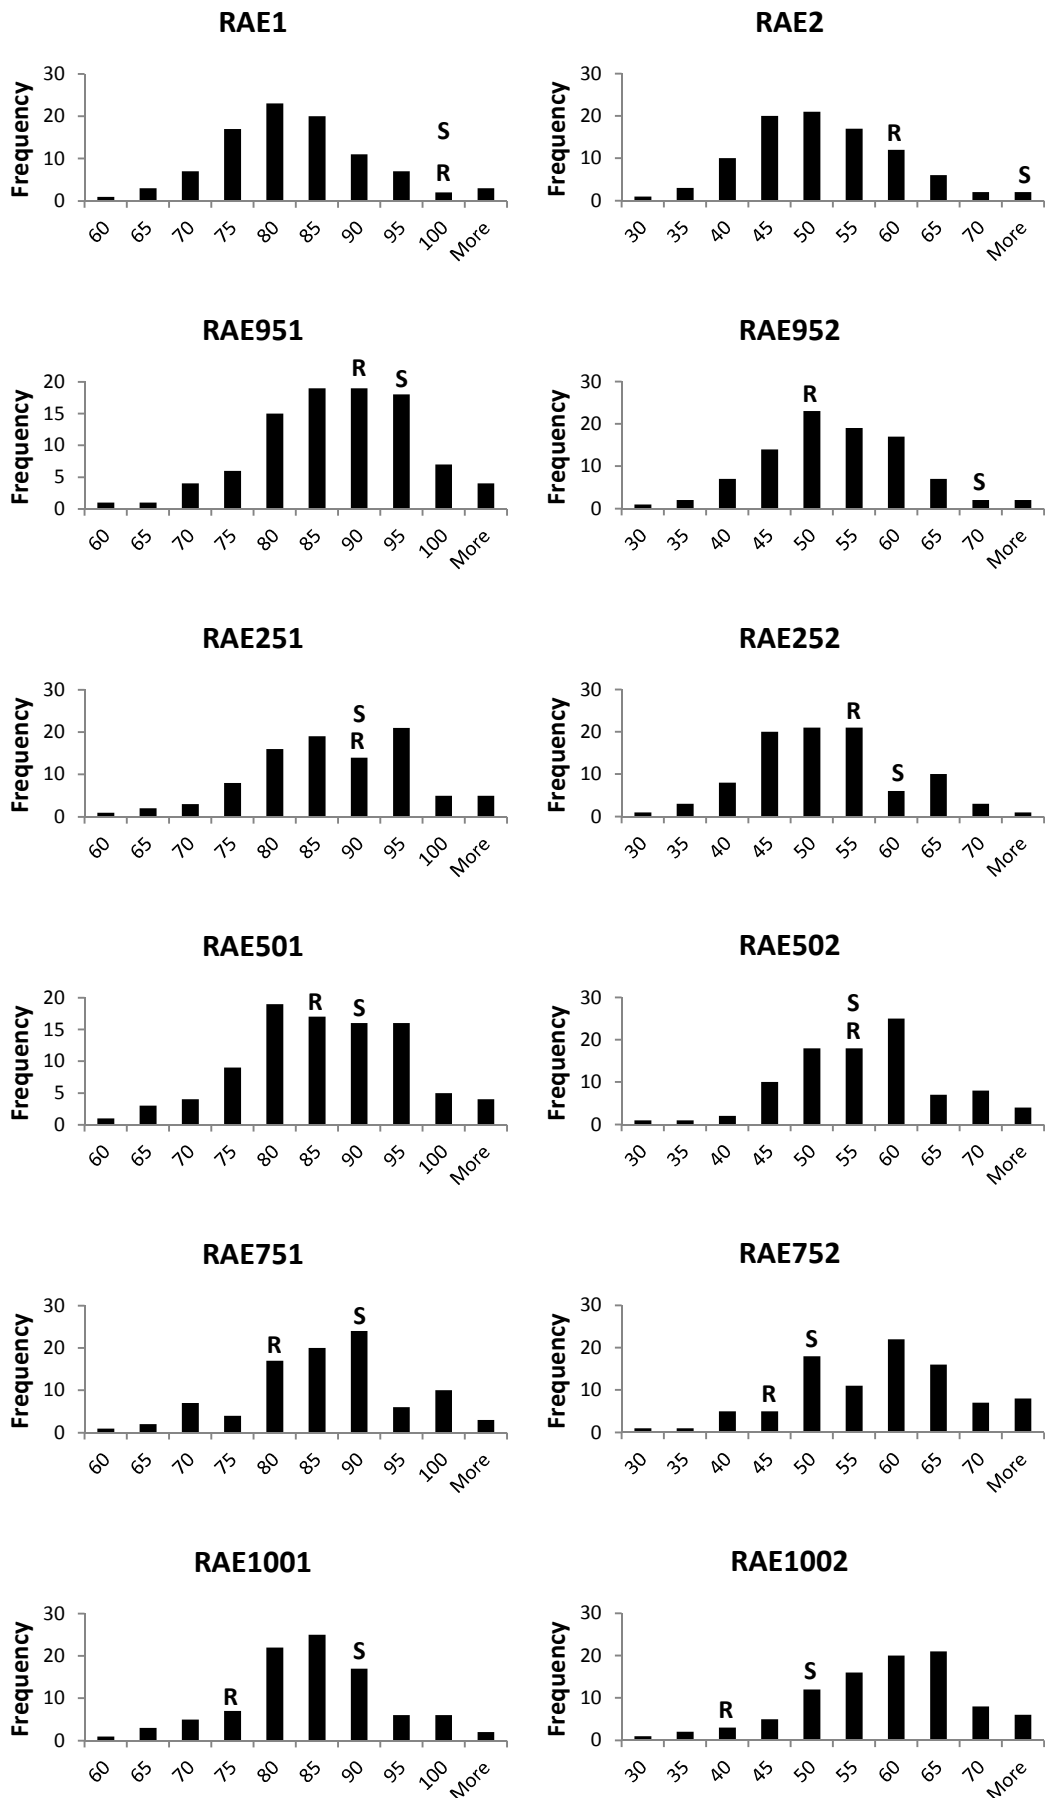

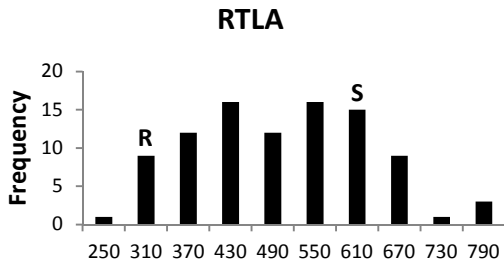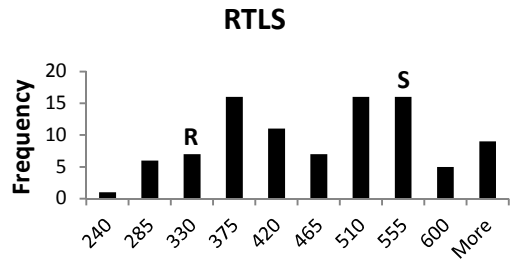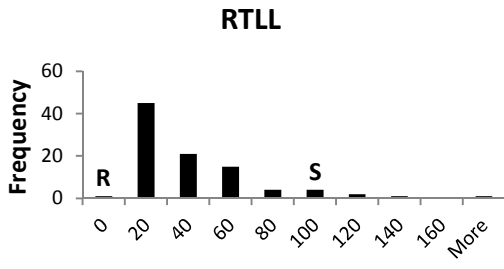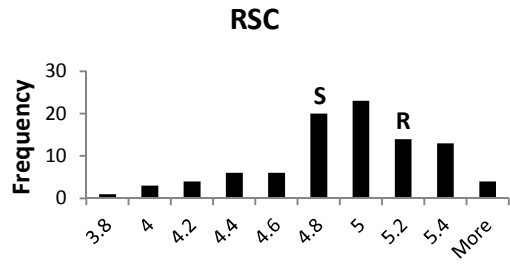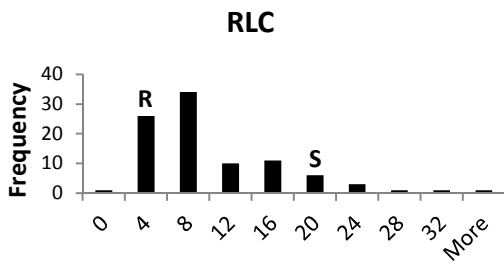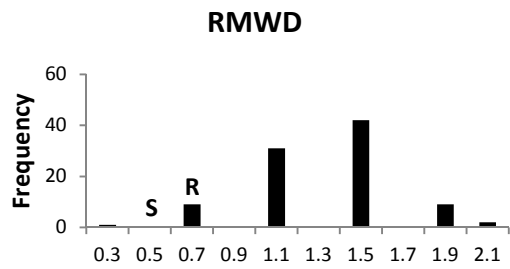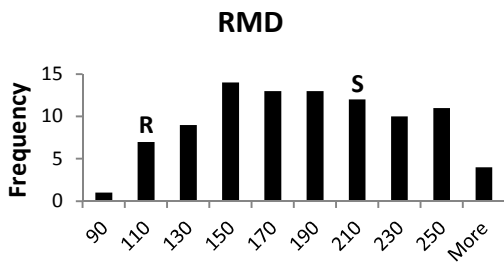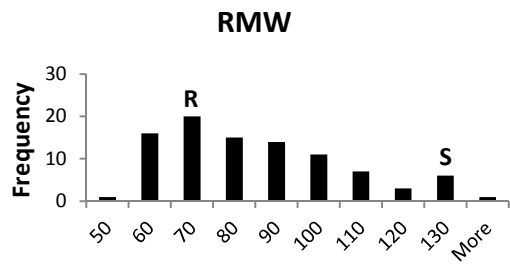

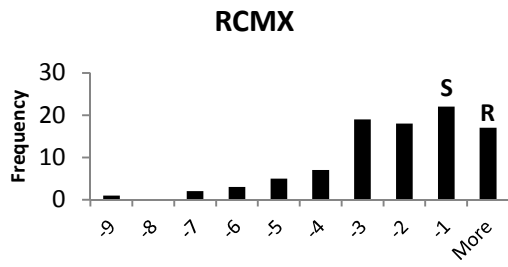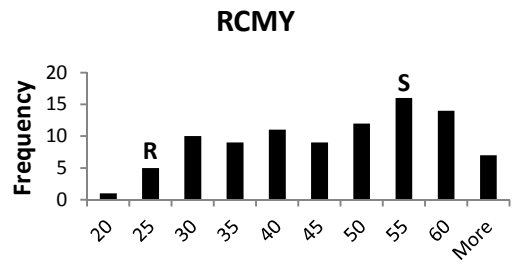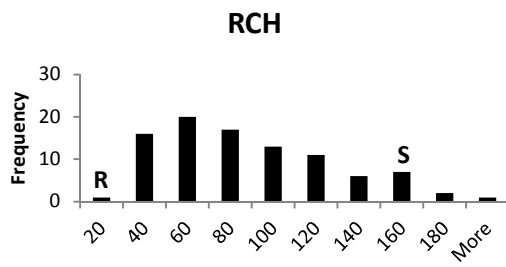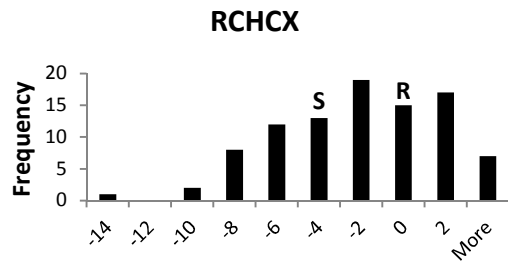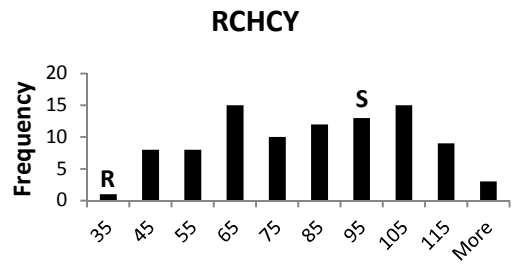

**Supplementary Figure 2. Distribution of field traits**

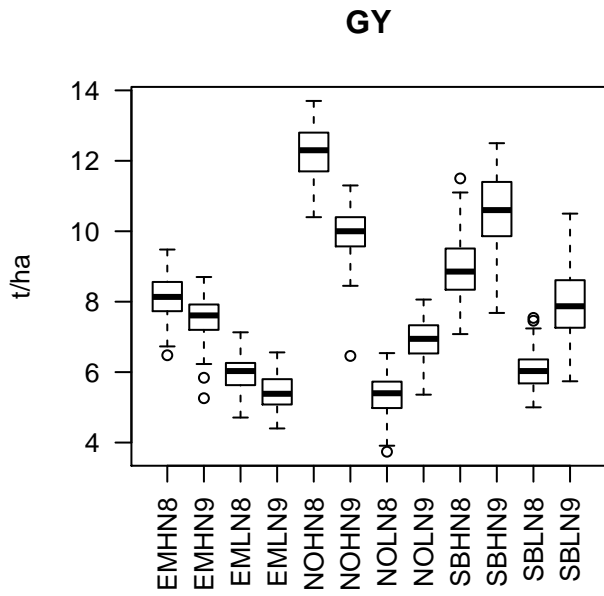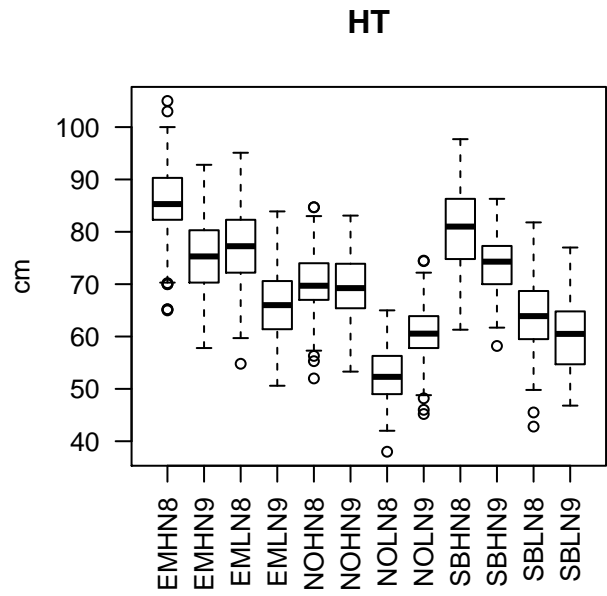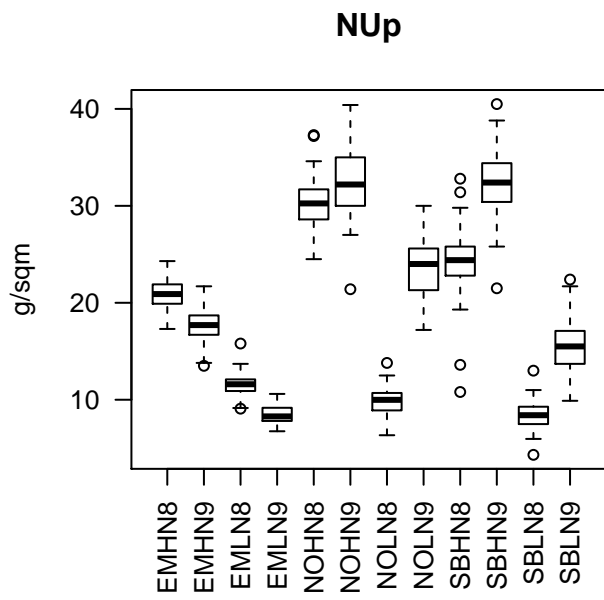

Supplement: supp_erv006_jexbot135848_file001.pdf [file supp_erv006_jexbot135848_file001.pdf]
